# Supplementary material for: Interactions between Australian cancer physicians and the pharmaceutical industry: a qualitative study
Source: HighWire-hosted journal article supplement (doi:10.1136/bmjopen-2022-065719), 2023-05-01
Supplement: bmjopen-2022-065719supp003_data_supplement.pdf [file bmjopen-2022-065719supp003_data_supplement.pdf]

## Appendix 3: Initial coding analysis framework

| Category              | Code                             | Sub-code                                                      |
|-----------------------|----------------------------------|---------------------------------------------------------------|
| Industry interactions | Descriptive experiences          | Positive experiences                                          |
|                       |                                  | Negative/uncomfortable experiences                            |
|                       | Style of engagement <sup>1</sup> | Confident                                                     |
|                       |                                  | Ambivalent                                                    |
|                       |                                  | Avoidant                                                      |
| Role of industry      | Perceived benefits               | Research funding                                              |
|                       |                                  | Education funding                                             |
|                       |                                  | Access programs/patient-centred                               |
|                       | Perceived risks                  | Perception of influence (personal and education) <sup>2</sup> |
|                       |                                  | Research dependence                                           |
| Industry payments     | Approaches                       | Unconditional acceptance                                      |
|                       |                                  | Conditional acceptance                                        |
|                       |                                  | Refusal                                                       |
|                       | Perceived appropriateness        | Renumeration of work (eg advisory boards)                     |
|                       |                                  | Sponsorship of travel/accommodation                           |
| Management strategies | Ethical guidelines               | Lack of utility of guidelines                                 |
|                       | Education/colleague guidance     | Need for more education                                       |
| Ideas for change      | Proposals for change             |                                                               |
| Emerging themes       |                                  |                                                               |

1. Doran et al., Soc Sci Med. 2006;62:1510–1519
2. Larkin J et al. BJGP Open. 2021; DOI: 10.3399/BJGPO.2021.0057
